# Supplementary material
Source: ML conference proceedings conference paper supplement (https://proceedings.mlr.press/v205/li23b.html)
Supplement: Supplementary file 1 [file li23b-supp.pdf]

# Supplementary for Learning Agile Skills via Adversarial Imitation of Rough Partial Demonstrations

## A Training Details

### A.1 Training Parameters

The learning networks and algorithm are implemented in PyTorch 1.10 with CUDA 11.3. Adam is used as the optimizer for the policy and value function with an adaptive learning rate with a KL divergence target of 0.01. The optimizer for the discriminator is SGD for LSGAN and RMSprop for WASABI. The discount factor  $\gamma$  is set to 0.99, the clip range  $\epsilon$  is set to 0.2, and the entropy coefficient  $\alpha$  is set to 0.01. The policy runs at 50 Hz. All training is done by collecting experiences from 4096 uncorrelated instances of the simulator in parallel. Most of the experiments are executed on the cluster of Max Planck Institute for Intelligent Systems with NVIDIA A100 and Tesla V100 GPUs. In this setting, one run with 5000 iterations with the specified compute settings and devices completes within 2 hours. The information is summarized in Table S1.

Table S1: Training parameters

| Parameter                                  | Symbol     | Value         |
|--------------------------------------------|------------|---------------|
| step time seconds                          | —          | 0.02          |
| max episode time seconds                   | —          | 20            |
| max iterations                             | —          | 5000          |
| steps per iteration                        | —          | 24            |
| policy learning epochs                     | —          | 5             |
| policy mini-batches                        | —          | 4             |
| KL divergence target                       | —          | 0.01          |
| discount factor                            | $\gamma$   | 0.99          |
| clip range                                 | $\epsilon$ | 0.2           |
| entropy coefficient                        | $\alpha$   | 0.01          |
| discriminator weight decay                 | $w^D$      | 0.001         |
| discriminator momentum                     | —          | 0.05          |
| discriminator gradient penalty coefficient | —          | 5.0           |
| discriminator learning epochs              | —          | 1             |
| discriminator mini-batches                 | —          | 80            |
| Wasserstein loss weight                    | $w^D$      | 0.5           |
| gradient penalty weight                    | $w^{GP}$   | 5.0           |
| parallel training environments             | —          | 4096          |
| number of seeds                            | —          | 5             |
| approximate training hours                 | —          | 2             |
| policy learning rate                       | $lr^\pi$   | grid-searched |
| discriminator learning rate                | $lr^D$     | grid-searched |
| discriminator observation horizon          | $H$        | grid-searched |
| imitation reward relative importance       | $w^I$      | grid-searched |

13

14 Note that policy learning rate, discriminator learning rate, discriminator observation horizon, and  
15 imitation reward relative importance are grid-searched and optimized in different tasks. We report the  
16 value used for evaluation in Sec. 4 in Table S2.

### A.2 Network Architecture

18 The network architecture is detailed in Table S3, where  $H$  denotes the discriminator observation  
19 horizon.

Table S2: Task-specific parameters

| Section            | Task                      | Method | $lr^\pi$             | $lr^D$               | $H$ | $w^I$ |
|--------------------|---------------------------|--------|----------------------|----------------------|-----|-------|
| Sec. 4.1<br>(Sim)  | SOLOBACKFLIP              | LSGAN  | $1.0 \times 10^{-6}$ | $1.0 \times 10^{-4}$ | 2   | 0.8   |
|                    |                           | WASABI | $1.0 \times 10^{-7}$ | $1.0 \times 10^{-7}$ | 16  | 4.0   |
| Sec. 4.2<br>(Sim)  | SOLOLEAP                  | LSGAN  | $1.0 \times 10^{-4}$ | $1.0 \times 10^{-4}$ | 2   | 0.8   |
|                    |                           | WASABI | $1.0 \times 10^{-7}$ | $5.0 \times 10^{-8}$ | 2   | 8.0   |
|                    | SOLOWAVE                  | LSGAN  | $1.0 \times 10^{-6}$ | $1.0 \times 10^{-4}$ | 4   | 0.8   |
|                    |                           | WASABI | $1.0 \times 10^{-6}$ | $5.0 \times 10^{-8}$ | 4   | 0.8   |
|                    | SOLOSTANDUP               | LSGAN  | $1.0 \times 10^{-4}$ | $1.0 \times 10^{-4}$ | 2   | 0.8   |
|                    |                           | WASABI | $1.0 \times 10^{-7}$ | $1.0 \times 10^{-7}$ | 4   | 4.0   |
|                    | SOLOBACKFLIP              | LSGAN  | $1.0 \times 10^{-6}$ | $1.0 \times 10^{-4}$ | 2   | 0.8   |
|                    |                           | WASABI | $1.0 \times 10^{-7}$ | $1.0 \times 10^{-7}$ | 16  | 4.0   |
|                    | SOLOSTANDUP <sup>†</sup>  | LSGAN  | $5.0 \times 10^{-5}$ | $5.0 \times 10^{-5}$ | 8   | 0.8   |
|                    |                           | WASABI | $1.0 \times 10^{-7}$ | $5.0 \times 10^{-7}$ | 2   | 4.0   |
|                    | SOLOSTANDUP*              | LSGAN  | $1.0 \times 10^{-4}$ | $1.0 \times 10^{-5}$ | 8   | 0.8   |
|                    |                           | WASABI | $5.0 \times 10^{-7}$ | $1.0 \times 10^{-7}$ | 2   | 4.0   |
|                    | SOLOBACKFLIP <sup>†</sup> | LSGAN  | $5.0 \times 10^{-5}$ | $1.0 \times 10^{-5}$ | 8   | 0.8   |
|                    |                           | WASABI | $1.0 \times 10^{-7}$ | $5.0 \times 10^{-8}$ | 2   | 4.0   |
|                    | SOLOBACKFLIP*             | LSGAN  | $1.0 \times 10^{-4}$ | $1.0 \times 10^{-5}$ | 8   | 0.8   |
|                    |                           | WASABI | $1.0 \times 10^{-7}$ | $5.0 \times 10^{-8}$ | 2   | 0.8   |
| Sec. 4.3<br>(Real) | SOLOLEAP                  | WASABI | $1.0 \times 10^{-3}$ | $5.0 \times 10^{-7}$ | 2   | 0.1   |
|                    | SOLOWAVE                  | WASABI | $1.0 \times 10^{-3}$ | $5.0 \times 10^{-7}$ | 2   | 0.1   |
|                    | SOLOBACKFLIP              | WASABI | $1.0 \times 10^{-3}$ | $5.0 \times 10^{-7}$ | 2   | 0.4   |

Table S3: Network architecture

| Network        | Symbol | Type | Shape                | Activation                    |
|----------------|--------|------|----------------------|-------------------------------|
| policy         | $\pi$  | MLP  | 68, 128, 128, 128, 8 | Exponential Linear Unit (ELU) |
| value function | $V$    | MLP  | 68, 128, 128, 128, 1 | Exponential Linear Unit (ELU) |
| discriminator  | $D$    | MLP  | 10H, 512, 256, 1     | Rectified Linear Unit (ReLU)  |

### 20 A.3 Domain Randomization

21 Two types of domain randomization techniques are applied during training to improve policy perfor-  
22 mance when transferring from simulation to the real system.

23 On the one hand, the base mass of the parallel training instances is perturbed with an additional weight  
24  $m' \sim \mathcal{U}(-0.5, 1.0)$ , where  $\mathcal{U}$  denotes uniform distribution. On the other hand, random pushing is  
25 also applied every 15 seconds on the robot base by forcing its horizontal linear velocity to be set  
26 randomly within  $v_{xy} \sim \mathcal{U}(-0.5, 0.5)$ .

## 27 B Model Representation

### 28 B.1 Discriminator Observation

29 Table S4 lists the extracted features sent to the discriminator.

30 For discriminator observation horizon  $H > 1$ , the entries are concatenated to a vector of size  $10H$ .  
31 The resulting features are then normalized and used as inputs to the discriminator network.

### 32 B.2 Policy Observation and Action Space

33 In our work, we use a universal set of states as the policy observations for all tasks. It has 68  
34 dimensions and consists of the same set of state measurements of two consecutive steps as detailed in

Table S4: Discriminator observation space

| Entry                 | Symbol   | Dimensions |
|-----------------------|----------|------------|
| base linear velocity  | $v$      | 0:3        |
| base angular velocity | $\omega$ | 3:6        |
| projected gravity     | $g$      | 6:9        |
| base height           | $z$      | 9:10       |

Table S5: Policy observation space

| Entry                 | Symbol    | Dimensions | noise level $b$ |
|-----------------------|-----------|------------|-----------------|
| base linear velocity  | $v$       | 0:3        | 0.2             |
| base angular velocity | $\omega$  | 3:6        | 0.05            |
| projected gravity     | $g$       | 6:9        | 0.05            |
| base height           | $z$       | 9:10       | 0.01            |
| joint positions       | $q$       | 10:18      | 0.01            |
| joint velocities      | $\dot{q}$ | 18:26      | 0.75            |
| last actions          | $a'$      | 26:34      | 0.0             |

35 Table S5. The observation space is composed of base linear and angular velocities  $v, \omega$  in the robot  
 36 frame, measurement of the gravity vector in the robot frame  $g$ , base height  $z$ , joint positions  $q$  and  
 37 velocities  $\dot{q}$ , and the most recent actions  $a'$ .

38 The noise level  $b$  denotes the artificial noise added during training to increase the policy robustness.  
 39 Note again that the policy receives the observation collection for two consecutive steps. This is not  
 40 necessarily optimal for all the tasks as less information would suffice for easier tasks. For simplicity,  
 41 we use this fixed set of observations for all experiments.

42 The action space is of 8 dimensions and encodes the target joint position for each of the 8 actuators.  
 43 The PD gains are set to 5.0 and 0.1, respectively.

## 44 C Regularization Reward Functions

45 The regularization reward functions contain only regularization terms whose formulation is detailed  
 46 below. A universal set of involved hyperparameters is used across different motions and is summarized  
 47 in Table S6.

### 48 C.1 Action Rate

$$r_{ar} = w_{ar} \|a' - a\|_2^2, \quad (\text{S1})$$

49 where  $w_{ar}$  denotes the weight of the action rate reward,  $a'$  and  $a$  denote the previous and current  
 50 actions.

### 51 C.2 Joint Acceleration

$$r_{qa} = w_{qa} \left\| \frac{\dot{q}' - \dot{q}}{\Delta t} \right\|_2^2, \quad (\text{S2})$$

52 where  $w_{qa}$  denotes the weight of the joint acceleration reward,  $\dot{q}'$  and  $\dot{q}$  denote the previous and  
 53 current joint velocity,  $\Delta t$  denotes the step time interval.

Table S6: Regularization reward hyperparameters

| Hyperparameter | $w_{ar}$ | $w_{qa}$               | $w_{qr}$               | $w_{\dot{\phi}}$ | $w_{\dot{\psi}}$ | $w_{\dot{y}}$ |
|----------------|----------|------------------------|------------------------|------------------|------------------|---------------|
| Value          | -0.005   | $-1.25 \times 10^{-8}$ | $-1.25 \times 10^{-6}$ | -0.001           | -0.001           | -0.001        |

54 **C.3 Joint Torque**

$$r_{q_T} = w_{q_T} \|T\|_2^2, \tag{S3}$$

55 where  $w_{q_T}$  denotes the weight of the joint torque reward,  $T$  denotes the joint torques.

56 **C.4 Angular Velocity  $x$**

$$r_{\dot{\phi}} = w_{\dot{\phi}} \|\dot{\phi}\|_2^2, \tag{S4}$$

57 where  $w_{\dot{\phi}}$  denotes the weight of the angular velocity  $x$  reward,  $\dot{\phi}$  denotes the base roll rate.

58 **C.5 Angular Velocity  $z$**

$$r_{\dot{\psi}} = w_{\dot{\psi}} \|\dot{\psi}\|_2^2, \tag{S5}$$

59 where  $w_{\dot{\psi}}$  denotes the weight of the angular velocity  $z$  reward,  $\dot{\psi}$  denotes the base yaw rate.

60 **C.6 Linear Velocity  $y$**

$$r_{\dot{y}} = w_{\dot{y}} \|\dot{y}\|_2^2, \tag{S6}$$

61 where  $w_{\dot{y}}$  denotes the weight of the linear velocity  $y$  reward,  $\dot{y}$  denotes the base lateral velocity.

62 **D Method Comparison**

63 In this section, we highlight the connections and differences between our work and the AMP work [1],  
64 in particular, how the LSGAN formulation in our setting relates to AMP.

65 **D.1 AMP Adapted for Task Learning Termed as LSGAN**

66 It is acknowledged that both WASABI and AMP utilize generative adversarial learning methods to  
67 learn motions from reference demonstrations. However, from a high-level view, WASABI aims to  
68 solve fundamentally different tasks as opposed to AMP.

69 Note that AMP itself does not target task reward learning. In AMP, the GAN model is employed  
70 to shape the styles of a learning agent while performing some other tasks, which are relatively  
71 straightforward and motivated by additional task reward functions (e.g. moving forward, reaching a  
72 target). This can be viewed as learning the regularization of motions. Indeed, we can adapt AMP  
73 to enable it to directly learn complex tasks by providing the desired motions as the reference and  
74 removing the original task reward. In addition, to alleviate the mode collapse issue as described in  
75 Sec. 3.2, the capability of the discriminator is extended to encompass longer observation horizons.  
76 With these adaptations, AMP is referred to as LSGAN in our work.

77 Typically, AMP learns demonstrated motions with sufficient exploration enabled by reference state  
78 initialization (RSI), where the agent is initialized randomly along the reference trajectories. However,  
79 in the setting of legged skill learning from only base information, RSI is not applicable due to the  
80 missing joint reference. This makes the robot difficult to directly imitate highly dynamic motions. And  
81 as shown in Table 1, the robot fails to adopt complex skills (e.g. SOLOSTANDUP, SOLOBACKFLIP)  
82 with the LSGAN implementation.

83 **D.2 WASABI Designed for Task Learning**

84 In contrast, WASABI is proposed to learn task rewards directly for agile motions from limited data.  
85 This becomes especially meaningful for tasks where the reward function is challenging to design and  
86 a decent expert is not immediately accessible. WASABI provides solutions to cases where we want  
87 to quickly develop a complex skill for robot learning, allowing us to hand-hold a robot (or an object)  
88 without actuating it and to learn directly from the demonstrated trajectories.

## 89 E Handcrafted Task Reward

90 Experts trained on handcrafted task rewards are used as a baseline to prove that WASABI is capable  
91 of extracting sensible task rewards. The policies learned using LSGAN and WASABI use 1000  
92 sampled trajectories generated by the experts in simulation as reference.

### 93 E.1 Upright Stand for SOLOSTANDUP

94 The robot is encouraged to stand up by rewarding the pitch angle of the base, the base height, and the  
95 standing on only the two hind legs.

$$r_\beta = w_{\theta_z}\theta_z + w_z z + w_g c_g, \quad (\text{S7})$$

96 where  $\theta_z$  denotes the pitch angle with respect to the global  $z$ -axis,  $w_{\theta_z} = 1.0$  denotes its weight.  $z$   
97 denotes the base height and  $w_z = 3.0$  denotes its weight.  $c_g$  is a binary variable that takes 1 if the  
98 front legs have no contact with the ground,  $w_g = 2.0$  denotes its weight.

### 99 E.2 Traversed Angle for SOLOBACKFLIP

100 The robot is encouraged to perform back-flipping by rewarding its traversed angle around the  $y$ -axis  
101 while in the air. This reward will be given only when the robot lands.

$$r_\theta = w_\theta \theta \llbracket s \in \mathcal{L} \rrbracket, \quad (\text{S8})$$

102 where  $w_\theta = 5.0$  denotes the weight of the traversed angle reward,  $\theta$  denotes the traversed angle  
103 around  $y$ -axis while in the air.  $\mathcal{L}$  is the set of robot landing states, and  $\llbracket \cdot \rrbracket$  is the Iverson bracket.

## 104 F Sim-to-Real Transfer

105 To deploy the learned policy on the real system, the following adaptations are made to reduce the  
106 sim-to-real gap.

### 107 F.1 Observation Space Adaptation

108 Generally, policies trained in simulation suffer from poor performance when transferred to the real  
109 system. One primary reason for such failures is the incorrectly modeled system dynamics. As a  
110 result, the state transitions observed in simulation may divert from reality. On account of this, instead  
111 of using two consecutive steps of the observation collection in Suppl. B.2, only the observation at  
112 the current time step is used. The resulting policy observation space has thus only 34 entries and is  
113 detailed in Table S5.

### 114 F.2 Training Hyperparameter Adaptation

115 Some training hyperparameters are further refined and specifically adapted for the deployment on the  
116 real system as detailed in Table S2.

### 117 F.3 Reward Adaptation

118 To generate stable joint actuation and achieve task-specific high performance, a feet air time regular-  
119 ization reward is introduced to motivate higher off-ground steps during robot movement.

$$r_{t_f} = w_{t_f} \sum_{i=1}^4 t_{f_i} \llbracket f_i \in \mathcal{C} \rrbracket, \quad (\text{S9})$$

120 where  $w_{t_f}$  denotes the weight of the feet air time reward,  $t_{f_i}$  denotes the time foot  $i$  stays in the air.  $\mathcal{C}$   
121 is the set of foot states touching the ground, and  $\llbracket \cdot \rrbracket$  is the Iverson bracket. The resulting task-specific  
122 regularization reward setting is provided in Table S7.

Table S7: Regularization reward adaptation

| Task         | $w_{ar}$ | $w_{q_a}$             | $w_{q_T}$             | $w_{\dot{\phi}}$ | $w_{\dot{\psi}}$ | $w_{ij}$ | $w_{t_f}$ |
|--------------|----------|-----------------------|-----------------------|------------------|------------------|----------|-----------|
| SOLOLEAP     | -0.01    | $-2.5 \times 10^{-7}$ | $-2.5 \times 10^{-5}$ | -0.05            | -0.05            | -0.05    | 0.10      |
| SOLOWAVE     | -0.01    | $-2.5 \times 10^{-7}$ | $-2.5 \times 10^{-5}$ | -0.01            | -0.01            | -0.01    | 0.05      |
| SOLOBACKFLIP | -0.01    | $-2.5 \times 10^{-7}$ | $-1.0 \times 10^{-5}$ | -0.02            | -0.02            | -0.02    | 0.00      |

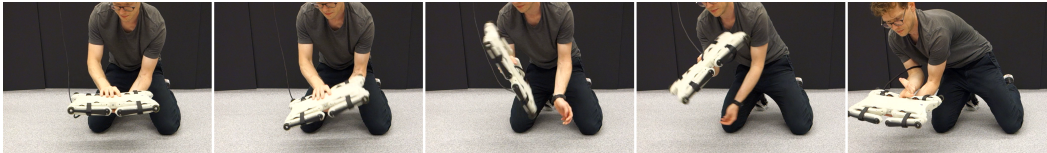

Figure S1: Hand-held motion demonstration for SOLOBACKFLIP. Note that the robot joints are not actuated and only base information is recorded.

## 123 F.4 Policy Transfer

124 In our work, the learned policies for SOLOLEAP, SOLOWAVE, and SOLOBACKFLIP successfully  
 125 transfer to the real system. However, during the deployment of the policy for SOLOSTANDUP from  
 126 either the handcrafted expert or obtained by WASABI, the robot fails to maintain balance after it  
 127 manages to stand up. As Solo 8 does not have Hip Abduction Adduction (HAA) joints, it could be  
 128 challenging to adapt against unexpected base rolling accordingly, which happens frequently after  
 129 standing up. This makes this task especially difficult. In addition, the sim-to-real gap could also be  
 130 potentially encoded in the inaccurate modeling of the point contacts between the feet and the ground,  
 131 which the robot requires to adapt constantly to maintain its attitude.

## 132 G Motions

### 133 G.1 Data Collection

134 The reference motions containing only the base information (as detailed in Sec. B.1) are performed by  
 135 a human demonstrator and recorded using a Vicon motion capture system as illustrated in Figure S1.  
 136 For each motion, 20 trajectories are recorded and used as the reference motion dataset. The number  
 137 of frames in the recorded trajectories for each motion is detailed in Table S8.

### 138 G.2 Motion Details

139 We provide sequences of the respective motions that we learn in this work in Fig. S2.

## 140 H Dynamic Time Warping Evaluation

141 We make use of an imitation reward as outlined in Sec. 3.1 for learning policies from rough reference  
 142 trajectories. Since the reference trajectories might not be completely achievable, either in terms of  
 143 time consistency or the actual sequence of states that are infeasible, a simple evaluation metric such  
 144 as the direct  $L_2$  distance between policy and reference trajectories is not applicable. Furthermore, a  
 145 learned policy might replicate the demonstrated motion perfectly in a certain sub-sequence, however,  
 146 in the absence of proper alignment and synchronization, it would incur a large penalty in terms of a  
 147 simple distance metric.

Table S8: Number of frames per recorded trajectory

|        | SOLOLEAP | SOLOWAVE | SOLOSTANDUP | SOLOBACKFLIP |
|--------|----------|----------|-------------|--------------|
| Frames | 130      | 130      | 100         | 60           |

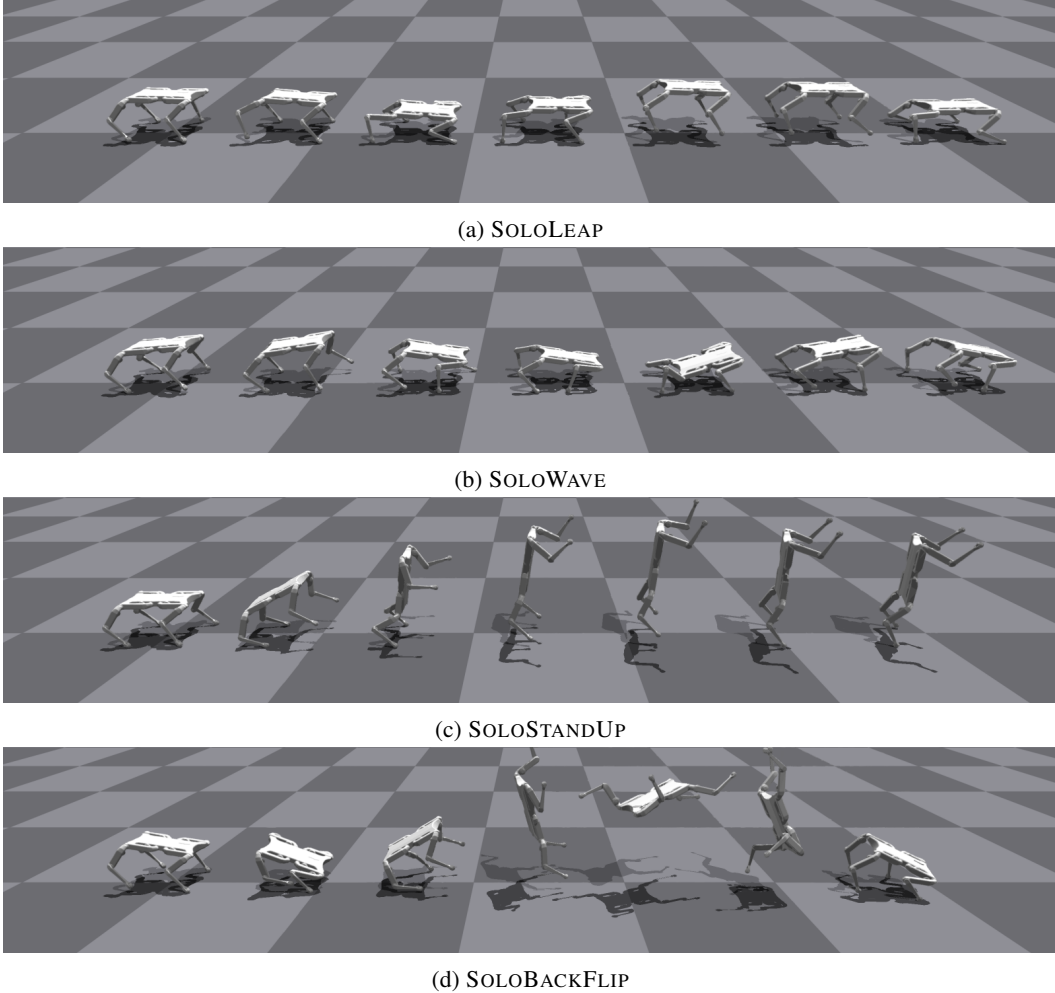

Figure S2: Task motion sequences induced by the learned policies in simulation.

148 To account for the potential misalignment in the policy vs. reference trajectories, the policy trajectories  
 149 need to be synchronized to the reference. Dynamic Time Warping (DTW) is an algorithm that  
 150 computes an alignment between two sequences such that a distance measure between the elements of  
 151 the sequences is minimized, under a set of matching constraints. This can be computed efficiently via  
 152 dynamic programming, an example of such a matching is given for our case in Fig. 1.

153 For the distance measure between the matched elements of the sequences we use the standard  $L_2$   
 154 distance, and for the matching computation, we use the ‘dtw’ Python package [2] with the Mori  
 155 asymmetric step pattern [3] and open-ended matching. The asymmetric step pattern constrains the  
 156 type of element matches that can happen between the trajectories and also makes it possible for some  
 157 elements to be skipped, while open-ended matching allows for ends of trajectories to be matched to  
 158 an earlier time point which is necessary to account for time shift. The resulting measure is denoted  
 159 with  $d^{\text{DTW}}$ .

160 As clarified in Sec. 4, we calculate the expectation

$$\mathbb{E} [d^{\text{DTW}}(\Phi(\tau_\pi), \tau_{\mathcal{M}})] \quad (\text{S10})$$

161 as the evaluation metric, where  $\tau_\pi \sim d^\pi$  is a state trajectory drawn from a policy rollout distribution  
 162 and  $\tau_{\mathcal{M}} \sim d^{\mathcal{M}}$  denotes a reference motion from the dataset. With the same notation as in Sec. 3.2,  
 163 the function  $\Phi$  maps each state in the state trajectory of the policy to the reference observation space  
 164  $\mathcal{O}$ . In practice, we estimate this by drawing 20 policy rollouts, comparing each of the 20 rollouts with

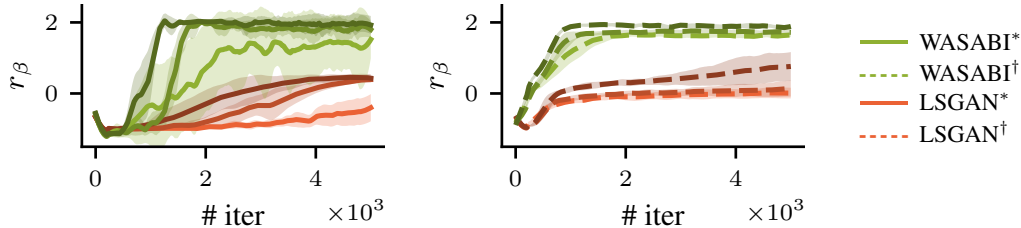

Figure S3: Performance of LSGAN (left) and WASABI (right) in terms of the handcrafted task reward for SOLOSTANDUP with different discriminator observation horizons (light  $H = 2$ , middle  $H = 4$ , dark  $H = 8$ ). Solid lines indicate full information (\*) and dashed lines indicate partial information (†).

165 20 collected reference trajectories, and taking the mean. Note that  $d^{DTW}$  is not comparable across  
 166 different tasks, thus we provide a pure standing reference in Table 1.

## 167 I Ablation Studies

168 To prevent mode collapse, we extend the capability of the discriminator by allowing more than one  
 169 state transition as input. In this section, we aim to investigate how the length of the discriminator  
 170 horizon may affect the learning process of the desired behaviors. Here we provide an evaluation  
 171 in terms of the handcrafted reward of policies learned with discriminator observations of horizon  
 172  $H = 2, 4, 8$  with LSGAN and WASABI in SOLOSTANDUP. The result is depicted in Fig. S3.

173 Observe that a longer horizon tends to help the policy converge earlier and yield slightly better  
 174 performance in terms of the handcrafted reward in both methods with either full or partial reference  
 175 information, even if the LSGAN fails to learn the stand-up behavior. A similar pattern is also revealed  
 176 in SOLOBACKFLIP, although it presents a weaker effect on policy convergence in comparison. The  
 177 potential reason is that the policy learns to avoid producing state transitions that align with only a  
 178 short sub-sequence of the reference motion. Such avoidance of mode collapse would prevent the  
 179 policy from getting stuck at the local optima and thus increase the overall performance.

180 However, the benefit brought about by a longer discriminator observation horizon is not identified  
 181 in tasks with hand-held reference motions where a direct performance metric is not applicable.  
 182 Sometimes a longer horizon may even result in failure of learning the desired motion which is  
 183 attainable with shorter horizons. An evaluation of performance improvement in terms of DTW  
 184 over iterations reveals no clear pattern on how different discriminator observation horizons affect  
 185 policy convergence. This may result from the time and state inconsistency in the hand-held reference  
 186 motions which may already alleviate mode collapse to some extent.

## 187 J Extensions

188 In this section, we present extensions of WASABI by small modifications to the adversarial imitation  
 189 learning framework proposed in our work. Supplementary videos for these extensions are available at  
 190 <https://sites.google.com/view/corl2022-wasabi/home>.

### 191 J.1 Active Velocity Control

192 In our work, the hand-held reference motions are recorded by a human demonstrator. For locomotion  
 193 tasks, if the demonstration speed is uniformly high in the reference dataset, the corresponding  
 194 recorded velocity terms are also high. During the training of the policy, the robot will try to mimic  
 195 the recorded data and thus operate at a high locomotion speed.

196 In contrast, if there is some variance in the velocity terms within the reference dataset, the policy  
 197 will have larger freedom in choosing its locomotion velocity. For this reason, we take advantage of



198 the variance within the human demonstration and realize active velocity control by introducing a  
199 target-conditioned velocity tracking reward as follows

$$r_{\dot{x}} = w_{\dot{x}} e^{-\frac{(c_{\dot{x}} - \dot{x})^2}{\sigma_{\dot{x}}^2}}, \quad (\text{S11})$$

200 where  $w_{\dot{x}} = 0.5$  denotes the weight of the velocity tracking reward,  $\dot{x}$  denotes the base longitudinal  
201 velocity,  $c_{\dot{x}}$  denotes the velocity command on the same direction, which is also observed by the  
202 control policy. And  $\sigma_{\dot{x}}^2 = 0.25$  denotes a temperature scale for the tracking error.

203 For SOLOLEAP and SOLOWAVE, we successfully enable active velocity control within the range  
204  $c_{\dot{x}} \in [0.1, 0.5]$  by utilizing the diversity of the demonstration speed within the reference dataset.

## 205 **J.2 Single Flip in SOLOBACKFLIP**

206 Using the same reference motion in SOLOBACKFLIP, active execution of a single flip is achieved  
207 by including an additional variable in the observation space of the control policy indicating whether  
208 the robot has finished a backflip. After the robot finishes a flip, the control policy stops receiving  
209 imitation signals from the discriminator by fixing a constant imitation reward output to prevent from  
210 learning a consecutive flip.

211 In the meanwhile, a stand-still reward term is imposed to regularize the joint configurations during  
212 landing and standing. The stand-still reward is formulated as follows

$$r_{q_0} = w_{q_0} \|q - q_0\|_2^2, \quad (\text{S12})$$

213 where  $w_{q_0} = 0.01$  denotes the weight of the stand-still reward,  $q$  denotes the current joint positions  
214 and  $q_0$  denotes the default joint positions when the robot stands.

215 **References**

- 216 [1] X. B. Peng, Z. Ma, P. Abbeel, S. Levine, and A. Kanazawa. AMP: Adversarial motion priors for  
217 stylized physics-based character control. *ACM Transactions on Graphics (TOG)*, 40(4):1–20,  
218 2021.
- 219 [2] T. Giorgino. Computing and visualizing dynamic time warping alignments in r: the dtw package.  
220 *Journal of Statistical Software*, 31:1–24, 2009.
- 221 [3] A. Mori, S. Uchida, R. Kurazume, R.-i. Taniguchi, T. Hasegawa, and H. Sakoe. Early recognition  
222 and prediction of gestures. In *18th International Conference on Pattern Recognition (ICPR'06)*,  
223 volume 3, pages 560–563. IEEE, 2006.
